# Supplementary material for: NMR characterisation of a highly conserved secondary structural RNA motif of Halobacterium halobium 23S rRNA
Source: Royal Society of Chemistry journal article supplement (doi:10.1039/c3ob40295a), 2013-01-01
Supplement: c3ob40295a.pdf [file c3ob40295a.pdf]

## Supplementary information

**Table 1:** The  $^1\text{H}$ ,  $^{13}\text{C}$  chemical shifts of the *H. hal.* 29-mer RNA based on the assignment of the exchangeable protons (measured at 2°C) and non-exchangeable proton, carbon resonances (measured at 25°C). A mark “~” indicates that the chemical shift was not obtained during assignment.

**Table 2:** Table giving information on the five groups of NOEs and the parameters used in CcpNmr Analysis to produce the NOE based distance constraints.

**Table 3:** Table indicating the approximate value of the  $^3J_{\text{H1}',\text{H2}'}$  for each residue and how the ribose of the residue was constrained based on this information. The final column indicates how the glycosic torsion angle ( $\chi$ ) was constrained.

**Table 4:** Table giving the imino proton chemical shifts and whether they were constrained as Watson-Crick base pairs in the structure determination.

**Table 5:** The Table shows the base pairs observed in the NMR structure of *H. hal.* 29mer RNA; whether they are standard Watson-Crick base pairs, their hydrogen bonds and their distances. The mark “---” indicates that the particular field is not relevant to the particular base pair.

**Table 6:** The Table shows the local base pair step parameters and the form of the RNA at a given step. A mark “~” indicates that the information could not be given.

**Table 7.1 – 7.6:** Additional helical parameters and dihedral angles for the *H. hal.* 29-mer NMR solution structure. The local step parameters are shown in Table 7.1 and the local base pair parameters are shown in Table 7.2. The ribose dihedral angles of the base paired residues, their sugar pucker, the amplitude of pseudorotation of the sugar ring and the phase angle of pseudorotation of the sugar ring are shown in Tables 7.3 and 7.4. Tables 7.5 and 7.6 show the backbone and glycosidic torsion angles of all the base paired residues.

|     | Imino | H61  | H62  | H21 | H22  | H41  | H42 | H5   | H6   | H8   | H2   | H1'  | H2'  | H3'  | H4'  | H5a  | H5b  | H6b | C1'   | C2' | C3' | C4' | C5'   | C6     | C5     | C2     | C8'    | C6     | C8  |
|-----|-------|------|------|-----|------|------|-----|------|------|------|------|------|------|------|------|------|------|-----|-------|-----|-----|-----|-------|--------|--------|--------|--------|--------|-----|
| C1  |       |      |      |     |      |      |     | 6.01 | 8.12 |      |      | 5.52 | 4.48 |      | 4.33 | 4.05 | 3.91 |     |       |     |     |     | 61.74 | 98.57  | 145.10 |        |        | C1     |     |
| C2  |       |      |      |     |      | 8.37 |     | 5.62 | 7.99 |      |      | 5.61 | 4.48 |      |      |      |      |     |       |     |     |     |       | 97.42  | 141.85 |        |        | C2     |     |
| C3  |       |      |      |     | 8.39 |      |     | 5.56 | 7.78 |      |      | 5.49 | 4.35 |      |      |      |      |     | 98.64 |     |     |     |       | 97.65  | 141.31 |        |        | C3     |     |
| U4  | 13.22 |      |      |     |      |      |     | 5.42 | 7.82 |      |      | 5.62 |      |      |      |      |      |     |       |     |     |     |       | 103.67 | 141.79 |        |        | U4     |     |
| A5  |       |      |      |     |      |      |     |      |      | 6.01 | 7.02 | 5.90 | 4.63 | 4.33 |      |      |      |     | 92.94 |     |     |     |       | 152.87 |        |        |        | A5     |     |
| U6  | 10.91 |      |      |     |      |      |     | 5.22 | 7.25 |      |      | 5.08 | 4.11 |      |      |      |      |     |       |     |     |     |       | 103.96 |        |        |        | U6     |     |
| A7  |       | 7.61 | 6.37 |     |      |      |     |      |      | 8.10 | 6.92 | 5.83 | 4.60 |      |      |      |      |     |       |     |     |     |       | 152.88 |        |        | 141.24 | A7     |     |
| G8  | 13.22 |      |      |     |      |      |     |      |      | 7.24 | 5.63 | 4.68 | 4.47 |      |      |      |      |     |       |     |     |     |       |        |        |        |        | G8     |     |
| A9  |       |      |      |     |      |      |     |      |      | 8.05 | 7.42 | 5.97 | 4.39 |      |      |      |      |     |       |     |     |     |       | 153.38 |        |        |        | A9     |     |
| G10 | 13.80 |      |      |     |      |      |     |      |      | 7.33 | 5.60 | 4.38 | 4.28 |      |      |      |      |     |       |     |     |     |       |        |        |        |        | G10    |     |
| C11 |       |      |      |     |      |      |     | 5.20 | 7.57 |      |      | 5.48 | 4.40 | 4.35 |      |      |      |     | 92.81 |     |     |     |       | 97.18  | 140.98 |        |        | C11    |     |
| U12 | 14.01 |      |      |     |      |      |     | 5.36 | 7.85 |      |      | 5.61 | 4.32 |      |      |      |      |     | 94.36 |     |     |     |       | 103.72 | 142.19 |        |        | U12    |     |
| U13 | 13.92 |      |      |     |      |      |     | 5.66 | 7.93 |      |      | 5.83 | 4.29 | 4.38 |      |      |      |     |       |     |     |     |       | 104.11 | 142.91 |        |        | U13    |     |
| U14 |       |      |      |     |      |      |     | 5.68 | 7.90 |      |      | 5.84 | 4.14 | 4.24 | 4.20 |      |      |     |       |     |     |     |       | 104.51 | 143.68 |        |        | U14    |     |
| A21 |       |      |      |     |      |      |     |      |      | 6.19 | 7.65 | 5.75 | 4.65 | 4.61 | 4.33 | 3.80 | 3.88 |     |       |     |     |     |       | 63.18  | 153.92 |        |        | A21    |     |
| A22 |       |      |      |     |      |      |     |      |      | 8.05 | 7.42 | 5.80 | 4.72 | 4.53 |      |      |      |     | 90.82 |     |     |     |       | 153.39 |        |        | 140.46 | A22    |     |
| A23 |       | 7.87 | 6.54 |     |      |      |     |      |      | 7.83 | 7.68 | 5.87 | 4.67 |      |      |      |      |     |       |     |     |     |       | 153.40 |        |        |        | A23    |     |
| G24 | 13.50 |      |      |     |      |      |     |      |      | 7.13 | 5.54 |      | 4.47 |      |      |      |      |     | 92.68 |     |     |     |       |        |        |        | 135.73 | G24    |     |
| C25 |       |      |      |     |      |      |     | 5.17 | 7.48 |      |      | 5.46 | 4.29 | 4.37 |      |      |      |     | 94.35 |     |     |     |       | 97.28  | 141.00 |        |        | C25    |     |
| U26 | 13.62 |      |      |     |      |      |     | 5.40 | 7.75 |      |      | 5.84 | 4.36 |      |      |      |      |     | 98.19 |     |     |     |       | 104.16 | 142.20 |        |        | U26    |     |
| A27 |       |      |      |     |      |      |     |      |      | 6.29 | 7.72 | 5.97 |      |      |      |      |      |     |       |     |     |     |       | 154.66 |        |        | 141.33 | A27    |     |
| C28 |       |      |      |     |      |      |     | 5.53 | 7.49 |      |      | 5.42 | 4.48 |      |      |      |      |     | 93.06 |     |     |     |       | 97.67  |        |        |        | C28    |     |
| C29 |       |      |      |     |      |      |     | 5.65 | 7.86 |      |      | 5.64 | 4.20 |      |      |      |      |     |       |     |     |     |       | 95.98  |        |        |        | C29    |     |
| U30 | 12.99 |      |      |     |      |      |     | 5.54 | 7.79 |      |      | 5.90 | 4.26 | 4.39 |      |      |      |     | 96.88 |     |     |     |       | 103.75 |        |        |        | U30    |     |
| U31 | 13.95 |      |      |     |      |      |     | 5.71 | 7.92 |      |      | 5.64 | 4.53 |      |      |      |      |     |       |     |     |     |       | 104.18 |        |        |        | U31    |     |
| A32 |       | 7.59 | 6.47 |     |      |      |     |      |      | 6.21 | 6.91 | 5.98 | 4.70 |      |      |      |      |     |       |     |     |     |       |        |        | 152.74 |        | 140.53 | A32 |
| G33 | 12.89 |      |      |     |      |      |     |      |      | 7.23 | 5.63 | 4.69 | 4.44 |      |      |      |      |     |       |     |     |     |       |        |        |        |        | G33    |     |
| G34 | 12.76 |      |      |     |      |      |     |      |      | 7.06 | 5.66 | 4.53 | 4.37 |      |      |      |      |     | 98.13 |     |     |     |       |        |        |        |        | G34    |     |
| C35 | 12.55 |      |      |     |      |      |     |      |      | 7.30 | 5.87 | 4.05 | 4.21 |      |      |      |      |     |       |     |     |     |       |        |        |        |        | 137.17 | C35 |

Table 1

| NOE group                              | Reference intensity | Reference distance | Upper/lower fractional error | Distance function | Number of constraints generated |
|----------------------------------------|---------------------|--------------------|------------------------------|-------------------|---------------------------------|
| Exchangeable                           | $7.99 \times 10^6$  | 3.2                | 1.00/1.00                    | $r^{-1/4}$        | 35                              |
| Non-overlapped                         | $7.65 \times 10^5$  | 3.7                | 0.30/0.30                    | $r^{-1/6}$        | 53                              |
| Overlapped                             | $7.65 \times 10^5$  | 3.7                | 0.60/0.30                    | $r^{-1/6}$        | 55                              |
| Very overlapped                        | $7.65 \times 10^5$  | 3.7                | 0.90/0.30                    | $r^{-1/6}$        | 77                              |
| Very, very overlapped                  | $7.65 \times 10^5$  | 3.7                | 1.20/0.30                    | $r^{-1/6}$        | 36                              |
| <b>Total number of NOE constraints</b> |                     |                    |                              |                   | <b>256</b>                      |

**Table 2**

| Residue | Approximate $^3J_{H1',H2'}$ (Hz) | Ribose constrained as | Glycosidic angle constrained as |
|---------|----------------------------------|-----------------------|---------------------------------|
| C1      | Small                            | $C_3$ -endo           | Unconstrained                   |
| C2      | Small                            | $C_3$ -endo           | <i>anti</i>                     |
| C3      | Small                            | $C_3$ -endo           | <i>anti</i>                     |
| U4      | Small                            | $C_3$ -endo           | <i>anti</i>                     |
| A5      | Small                            | $C_3$ -endo           | Unconstrained                   |
| U6      | Small                            | Unconstrained         | Unconstrained                   |
| A7      | Small                            | Unconstrained         | Unconstrained                   |
| G8      | Large                            | Unconstrained         | Unconstrained                   |
| A9      | Small                            | Unconstrained         | Unconstrained                   |
| G10     | Small                            | $C_3$ -endo           | <i>anti</i>                     |
| C11     | Small                            | $C_3$ -endo           | <i>anti</i>                     |
| U12     | Small                            | Unconstrained         | <i>anti</i>                     |
| U13     | Large                            | $C_2$ -endo           | <i>anti</i>                     |
| U14     | Large                            | $C_2$ -endo           | Unconstrained                   |
| A21     | Large                            | $C_2$ -endo           | Unconstrained                   |
| A22     | Small                            | $C_3$ -endo           | <i>anti</i>                     |
| A23     | Small                            | Unconstrained         | <i>anti</i>                     |
| G24     | Small                            | $C_3$ -endo           | <i>anti</i>                     |
| C25     | Small                            | $C_3$ -endo           | <i>anti</i>                     |

|     |       |                           |               |
|-----|-------|---------------------------|---------------|
| U26 | Large | Unconstrained             | Unconstrained |
| A27 | Large | Unconstrained             | Unconstrained |
| C28 | Small | Unconstrained             | Unconstrained |
| C29 | Small | Unconstrained             | Unconstrained |
| U30 | Small | Unconstrained             | Unconstrained |
| U31 | Small | Unconstrained             | <i>anti</i>   |
| A32 | Large | Unconstrained             | <i>anti</i>   |
| G33 | Small | <i>C<sub>3</sub>-endo</i> | <i>anti</i>   |
| G34 | Small | <i>C<sub>3</sub>-endo</i> | <i>anti</i>   |
| G35 | Large | <i>C<sub>2</sub>-endo</i> | Unconstrained |

**Table 3**

| <b>Base pair</b> | <b>Imino chemical shift (<math>\delta</math>, ppm)</b> | <b>Base pair constrained?</b> |
|------------------|--------------------------------------------------------|-------------------------------|
| C1-G35           | 12.56                                                  | Yes                           |
| C2-G34           | 12.76                                                  | Yes                           |
| C3-G33           | 12.99                                                  | Yes                           |
| U4-A32           | 13.22                                                  | Yes                           |
| A5-U31           | 13.95                                                  | Yes                           |
| A7-U30           | 12.99                                                  | No                            |
| G8-C29           | 13.22                                                  | No                            |
| A9-U26           | 13.62                                                  | No                            |
| G10-C25          | 13.50                                                  | Yes                           |
| C11-G24          | 13.50                                                  | Yes                           |
| U12-A23          | 14.01                                                  | Yes                           |
| U13-A22          | 13.92                                                  | Yes                           |
| U14-A21          | ~                                                      | Yes                           |

**Table 4**

| Base pair | W-C type? | First hydrogen bond | Distance (Å) | Second hydrogen bond | Distance (Å) | Third hydrogen bond | Distance (Å) | Fourth hydrogen bond | Distance (Å) |
|-----------|-----------|---------------------|--------------|----------------------|--------------|---------------------|--------------|----------------------|--------------|
| 1C-G35    | Yes       | O2 - N2             | 2.99         | N3 - N1              | 2.78         | N4 - O6             | 2.92         | ---                  | ---          |
| 2C-G34    | Yes       | O2 - N2             | 2.40         | N3 - N1              | 2.37         | N4 - O6             | 2.35         | ---                  | ---          |
| 3C-G33    | Yes       | O2 - N2             | 2.72         | N3 - N1              | 2.62         | N4 - O6             | 2.55         | ---                  | ---          |
| 4U-A32    | Yes       | N3 - N1             | 2.82         | O4 - N6              | 2.58         | ---                 | ---          | ---                  | ---          |
| 5A-U31    | Yes       | N1 - O2             | 2.40         | N1 - N3              | 2.60         | ---                 | ---          | ---                  | ---          |
| 6U-U30    | No        | N3 - O2             | 4.24         | O4-N3                | 4.46         | ---                 | ---          | ---                  | ---          |
| 7A-C29    | No        | N1 - N3             | 3.33         | N1-N4                | 3.31         | N6-N4               | 3.16         | ---                  | ---          |
| 8G-C28    | No        | N1 - N3             | 3.50         | O6 - N3              | 2.76         | ---                 | ---          | ---                  | ---          |
| 9A-A27    | No        | N3 - N1             | 3.39         | N1 - N3              | 3.93         | N6 - N7             | 4.15         | N7-N6                | 4.43         |
| 10G-C25   | Yes       | N2 - O2             | 3.01         | N1 - N3              | 2.77         | O6 - N4             | 2.50         | ---                  | ---          |
| 11C-G24   | Yes       | O2 - N2             | 2.25         | N3 - N1              | 2.33         | N4 - O6             | 2.33         | ---                  | ---          |
| 12U-A23   | Yes       | O2 - N1             | 2.72         | N3 - N1              | 2.67         | ---                 | ---          | ---                  | ---          |
| 13U-A22   | Yes       | N3 - N1             | 2.64         | O4 - N6              | 2.75         | ---                 | ---          | ---                  | ---          |
| 14U-A21   | Yes       | N3 - N1             | 2.49         | O4 - N6              | 2.94         | ---                 | ---          | ---                  | ---          |

**Table 5**

| Step            | Shift<br>(D <sub>x</sub> ) | Slide<br>(D <sub>y</sub> ) | Rise<br>(D <sub>z</sub> ) | Tilt ( $\tau$ ) | Roll ( $\rho$ ) | Twist ( $\Omega$ ) | Form |
|-----------------|----------------------------|----------------------------|---------------------------|-----------------|-----------------|--------------------|------|
| C1-C2/G34-G35   | 0.73                       | -1.35                      | 3.83                      | -13.84          | 12.24           | 27.74              | A    |
| C2-C3/G33-G34   | 0.15                       | -1.41                      | 3.60                      | 15.13           | 7.21            | 27.42              | A    |
| C3-U4/A32-G33   | -1.45                      | -1.13                      | 3.80                      | -5.84           | 4.24            | 29.32              | A    |
| U4-A5/U31-A32   | 0.22                       | -1.78                      | 3.23                      | -3.91           | 4.45            | 29.12              | A    |
| A5-U6/U30-U31   | 0.58                       | -1.35                      | 3.16                      | 6.48            | 0.77            | 34.27              | A    |
| U6-G8/C29-U30   | -0.96                      | -1.41                      | 5.91                      | 16.73           | 3.26            | 46.73              | ~    |
| G8-A9/A27-C29   | -0.46                      | 0.18                       | 5.55                      | -12.35          | 13.56           | 67.04              | ~    |
| A9-G10/C25-A27  | 3.37                       | -1.98                      | 5.07                      | -22.34          | 5.28            | 30.30              | A    |
| G10-C11/G24-C25 | 0.01                       | -2.12                      | 4.55                      | -1.59           | 9.24            | 26.97              | A    |
| C11-U12/A23-G24 | -0.40                      | -1.64                      | 3.63                      | 6.55            | 13.55           | 24.49              | ~    |
| U12-U13/A22-A23 | 1.39                       | -0.83                      | 3.92                      | -3.19           | -7.32           | 31.30              | ~    |
| U13-U14/A21-A22 | 0.32                       | -1.36                      | 4.31                      | -10.39          | -11.27          | 27.92              | ~    |

**Table 6**

| Step            | X-displacement | Y-displacement | Inclination | Tip    |
|-----------------|----------------|----------------|-------------|--------|
| C1-C2/G34-G35   | -4.53          | -1.92          | 23.90       | 15.16  |
| C2-C3/G33-G34   | -6.02          | 3.94           | 20.48       | -16.39 |
| C3-U4/A32-G33   | -3.29          | -0.74          | 2.34        | 6.95   |
| U4-A5/U31-A32   | -5.40          | -1.25          | 13.52       | 10.93  |
| A5-U6/U30-U31   | -1.81          | -2.19          | -2.22       | -12.72 |
| U6-A7/C29-U30   | -1.06          | 2.94           | 2.62        | -22.29 |
| A7-G8/C28-A27   | -4.06          | 5.18           | 31.01       | 11.55  |
| G8-A9/A27-C28   | -1.91          | -3.26          | 3.35        | 2.11   |
| A9-G10/C25-A27  | -2.58          | -6.04          | 8.15        | 36.67  |
| G10-C11/G24-C25 | -7.77          | -0.67          | 25.44       | -0.23  |
| C11-U12/A23-G24 | -5.60          | 3.29           | 26.47       | -19.61 |
| U12-U13/A22-A23 | -0.84          | -0.96          | -5.20       | 4.36   |
| U13-U14/A21-A22 | 1.04           | -5.37          | -19.27      | 16.97  |

**Table 7.1:** Shows the local base pair step parameters of the *H. hal.* 29-mer NMR solution structure.

| Base pair | Shear | Stretch | Stagger | Buckle | Propeller | Opening |
|-----------|-------|---------|---------|--------|-----------|---------|
| C1-G35    | -0.37 | -0.38   | -0.86   | -3.81  | 29.95     | -10.85  |
| C2-G34    | -0.10 | -0.67   | 0.19    | 13.09  | 11.35     | -0.03   |
| C3-G33    | -0.32 | -0.98   | -1.67   | 3.99   | 7.42      | -11.22  |
| U4-A32    | 0.14  | -0.31   | -0.62   | 1.51   | -2.76     | -8.36   |
| A5-U31    | 0.22  | -1.02   | 1.43    | 0.72   | -17.19    | -10.66  |
| U6-U30    | -1.87 | -0.48   | 1.30    | -7.40  | -26.19    | 12.37   |
| A7-C29    | 0.96  | -0.34   | -2.07   | -7.35  | -6.18     | -1.92   |
| G8-C28    | -0.07 | -0.62   | -2.33   | -7.86  | -21.46    | -52.50  |
| A9-A27    | 1.06  | -0.14   | -0.89   | -21.26 | 10.74     | -25.28  |
| G10-C25   | 0.19  | -0.28   | 0.02    | 12.03  | 14.60     | -8.98   |
| C11-G24   | 0.02  | -0.71   | -0.23   | 0.23   | 5.81      | -1.55   |
| U12-A23   | 0.14  | -0.89   | -1.71   | 6.95   | 7.04      | -10.68  |
| U13-A22   | 0.02  | -0.80   | -1.68   | 14.84  | 12.68     | -10.37  |
| U14-A21   | 0.35  | -0.56   | 0.69    | -0.98  | 30.60     | 14.97   |

**Table 7.2:** Shows the local base pair parameters of the *H. hal.* 29-mer NMR solution structure.

| Residue | $\nu_0$ | $\nu_1$ | $\nu_2$ | $\nu_3$ | $\nu_4$ | tm   | P     | Puckering    |
|---------|---------|---------|---------|---------|---------|------|-------|--------------|
| C1      | -14.2   | -9.1    | 27.0    | -36.6   | 31.8    | 36.0 | 41.5  | $C_4'$ -exo  |
| C2      | -6.2    | -17.3   | 32.3    | -37.4   | 27.5    | 36.7 | 28.4  | $C_3'$ -endo |
| C3      | -15.5   | -8.4    | 27.1    | -37.3   | 33.2    | 37.0 | 43.0  | $C_4'$ -exo  |
| U4      | -6.6    | -15.0   | 29.7    | -34.8   | 25.7    | 34.2 | 29.7  | $C_3'$ -endo |
| A5      | -1.7    | -20.1   | 32.5    | -35.1   | 23.2    | 35.0 | 21.7  | $C_3'$ -endo |
| U6      | -0.4    | -23.8   | 37.1    | -38.7   | 24.7    | 39.4 | 19.3  | $C_3'$ -endo |
| A7      | -17.0   | -1.9    | 18.4    | -29     | 28.8    | 30.0 | 52.2  | $C_4'$ -exo  |
| G8      | -24.4   | 6.9     | 11.3    | -26     | 31.7    | 31.1 | 68.6  | $C_4'$ -exo  |
| A9      | -18.7   | -2.6    | 21.1    | -32.8   | 31.9    | 33.7 | 51.3  | $C_4'$ -exo  |
| G10     | -7.1    | -16.1   | 31.4    | -37     | 27.7    | 36.3 | 29.9  | $C_3'$ -endo |
| C11     | -18.6   | -5.5    | 25.7    | -37.8   | 35.3    | 38.0 | 47.4  | $C_4'$ -exo  |
| U12     | -32.8   | 23.6    | -6.5    | -12.7   | 28.6    | 32.4 | 101.5 | $O_4'$ -endo |
| U13     | -28.4   | 33.0    | -25.4   | 9.5     | 11.9    | 32.8 | 140.8 | $C_1'$ -exo  |
| U14     | -26.9   | 36.2    | -31.2   | 16.5    | 6.3     | 35.6 | 151.1 | $C_2'$ -endo |

**Table 7.3:** Shows the ribose dihedral angles,  $\nu_0$  to  $\nu_4$ , the amplitude of *pseudorotation* of the sugar ring, tm, the phase angle of pseudorotation of the sugar ring, P, and the resultant type of puckering of the first strand of the *H. hal.* 29-mer NMR solution structure.

| Residue | $\nu_0$ | $\nu_1$ | $\nu_2$ | $\nu_3$ | $\nu_4$ | tm   | P     | Puckering    |
|---------|---------|---------|---------|---------|---------|------|-------|--------------|
| G35     | -29.4   | 43.8    | -40.3   | 24.6    | 2.8     | 43.6 | 157.5 | $C_2'$ -endo |
| G34     | -20.9   | -3.0    | 23.8    | -37.2   | 36.2    | 38.0 | 51.2  | $C_4'$ -exo  |
| G33     | -23.6   | -1.2    | 23.6    | -38.4   | 38.9    | 40.1 | 54.0  | $C_4'$ -exo  |
| A32     | -13.8   | -10.8   | 29.4    | -38.8   | 32.9    | 38.1 | 39.5  | $C_4'$ -exo  |
| U31     | 5.6     | -27.7   | 37.5    | -36.0   | 19.2    | 38.2 | 10.8  | $C_3'$ -endo |
| U30     | -12.4   | -10.3   | 27.3    | -35.6   | 30.0    | 35.0 | 38.8  | $C_4'$ -exo  |
| C29     | -16.1   | 6.7     | 4.3     | -13.9   | 18.9    | 18.6 | 76.6  | $O_4'$ -endo |
| C28     | -24.2   | 0.2     | 21.5    | -36.4   | 38.3    | 38.7 | 56.3  | $C_4'$ -exo  |
| A27     | -21.4   | 13.6    | -1.5    | -11.0   | 20.3    | 21.6 | 93.9  | $O_4'$ -endo |
| C25     | -22.5   | -1.2    | 22.5    | -36.7   | 37.0    | 38.1 | 53.9  | $C_4'$ -exo  |
| G24     | -8.8    | -14.9   | 31.1    | -37.7   | 29.2    | 36.9 | 32.4  | $C_3'$ -endo |
| A23     | -5.0    | -18.2   | 32.6    | -37.1   | 26.6    | 36.5 | 26.6  | $C_3'$ -endo |
| A22     | -3.6    | -19.3   | 33.4    | -37.0   | 25.4    | 36.6 | 24.4  | $C_3'$ -endo |
| A21     | 9.2     | 5.9     | -17.7   | 23.7    | -20.6   | 23.5 | 221.2 | $C_4'$ -endo |

**Table 7.4:** Shows the ribose dihedral angles,  $\nu_0$  to  $\nu_4$ , the amplitude of *pseudorotation* of the sugar ring, tm, the phase angle of *pseudorotation* of the sugar ring, P, and the resultant type of puckering of the second strand of the *H. hal.* 29-mer NMR solution structure.

| Residue | alpha | beta   | gamma | delta | epsilon | zeta   | chi    |
|---------|-------|--------|-------|-------|---------|--------|--------|
| C1      | ---   | ---    | 53.6  | 81.7  | -156.7  | -75.5  | -157.8 |
| C2      | -65.3 | 171.2  | 53.1  | 81.8  | -156.5  | -71.8  | -156.8 |
| C3      | -64.0 | 171.9  | 53.5  | 81.7  | -158.5  | -73.1  | -157.1 |
| U4      | -61.2 | 171.3  | 54.7  | 82.2  | -165.4  | -77.9  | -156.5 |
| A5      | 157.7 | -158.1 | 177.1 | 86.8  | -144.4  | -67.3  | -170.3 |
| U6      | -64.7 | 161.1  | 62.2  | 82.5  | -156.0  | -67.6  | -161.7 |
| A7      | -66.9 | 165.3  | 60.9  | 87.3  | -167.8  | -93.4  | -145.8 |
| G8      | -64.8 | 174.5  | 51.9  | 98.6  | -153.5  | -68.5  | -151.9 |
| A9      | -66.1 | 165.3  | 56.9  | 85.3  | -158.1  | -67.0  | -157.8 |
| G10     | -64.1 | 179.1  | 53.1  | 82.6  | -156.0  | -66.3  | -158.5 |
| C11     | -64.0 | 179.9  | 53.5  | 82.4  | -156.4  | -69.2  | -158.0 |
| U12     | -64.7 | -179.0 | 51.4  | 109.6 | -178.5  | -89.4  | -125.1 |
| U13     | -62.7 | -177.4 | 51.7  | 131.5 | -166.5  | -100.8 | -118.7 |
| U14     | -60.8 | 175.3  | 62.9  | 136.6 | ---     | ---    | -130.0 |

**Table 7.5:** Shows the backbone dihedral angles, for the base paired residues of the first strand of the *H. hal.* 29-mer NMR solution structure. The mark “---” indicates that the particular dihedral angle is not applicable to the particular residue.

| <b>Residue</b> | <b>alpha</b> | <b>beta</b> | <b>gamma</b> | <b>delta</b> | <b>epsilon</b> | <b>zeta</b> | <b>chi</b> |
|----------------|--------------|-------------|--------------|--------------|----------------|-------------|------------|
| G35            | -64.3        | -176.4      | 50.9         | 142.6        | ---            | ---         | -108.2     |
| G34            | -64.0        | 179.4       | 52.9         | 82.4         | -157.3         | -70.7       | -158.3     |
| G33            | -61.8        | 172.3       | 53.9         | 82.0         | -156.6         | -69.5       | -157.7     |
| A32            | -64.0        | 170.2       | 53.9         | 82.1         | -157.1         | -66.8       | -158.6     |
| U31            | -67.7        | 172.1       | 53.3         | 82.3         | -154.6         | -61.3       | -157.9     |
| U30            | -64.8        | 172.1       | 55.8         | 82.3         | -161.1         | -91.0       | -157.1     |
| C29            | -65.1        | 170.7       | 51.4         | 110.0        | -175.7         | -66.1       | -132.7     |
| A27            | -58.6        | 171.6       | 54.7         | 83.3         | -155.0         | -62.0       | -149.1     |
| U26            | -66.6        | 173.8       | 51.8         | 112.1        | 177.5          | -96.2       | -123.8     |
| C25            | -63.6        | -179.3      | 53.5         | 82.0         | -157.9         | -74.4       | -157.9     |
| G24            | -64.1        | 178.0       | 53.9         | 82.4         | -156.5         | -68.1       | -157.5     |
| A23            | -63.3        | 171.9       | 53.4         | 82.4         | -156.0         | -67.6       | -155.8     |
| A22            | -106.9       | 159.0       | 91.0         | 83.1         | -155.9         | -74.0       | -164.1     |
| A21            | ---          | ---         | 51.9         | 143.5        | 176.8          | -95.3       | -120.0     |

**Table 7.6:** Shows the backbone dihedral angles, for the base paired residues of the second strand of the *H. hal.* 29-mer NMR solution structure. The mark “---” indicates that the particular dihedral angle is not applicable to the particular residue.
